# Supplementary figures and images for: Real-time assay for testing components of protein synthesis
Source: PubMed Central journal article supplement — Nucleic Acids Res. 2012 Mar 14;40(12):e88. doi: 10.1093/nar/gks232 (PMC3384345; doi:10.1093/nar/gks232), 2012-03-14

Fig. S1

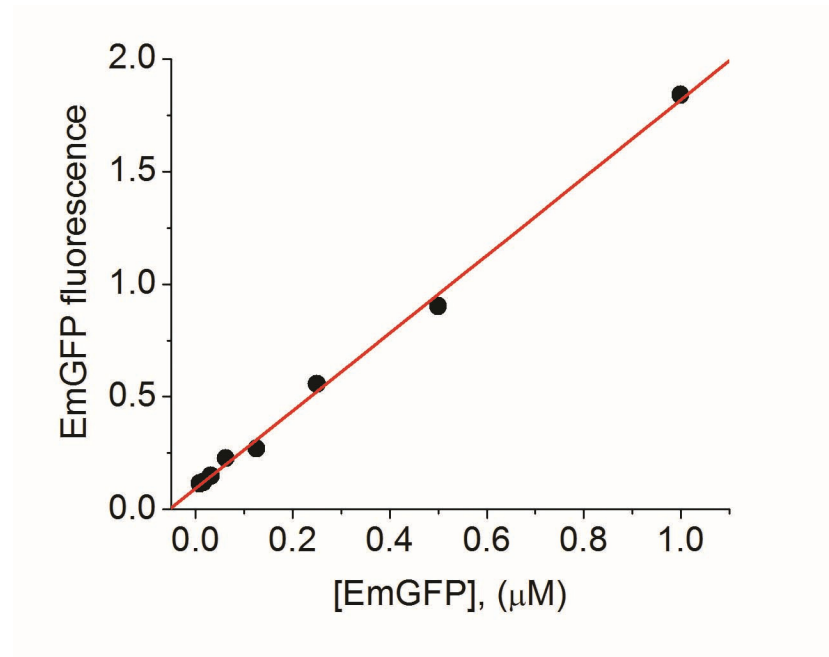

Fig. S2

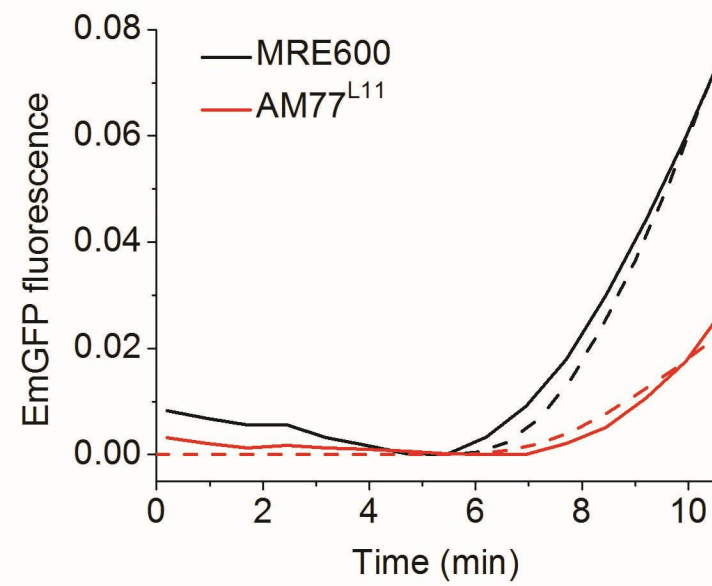

Fig. S3

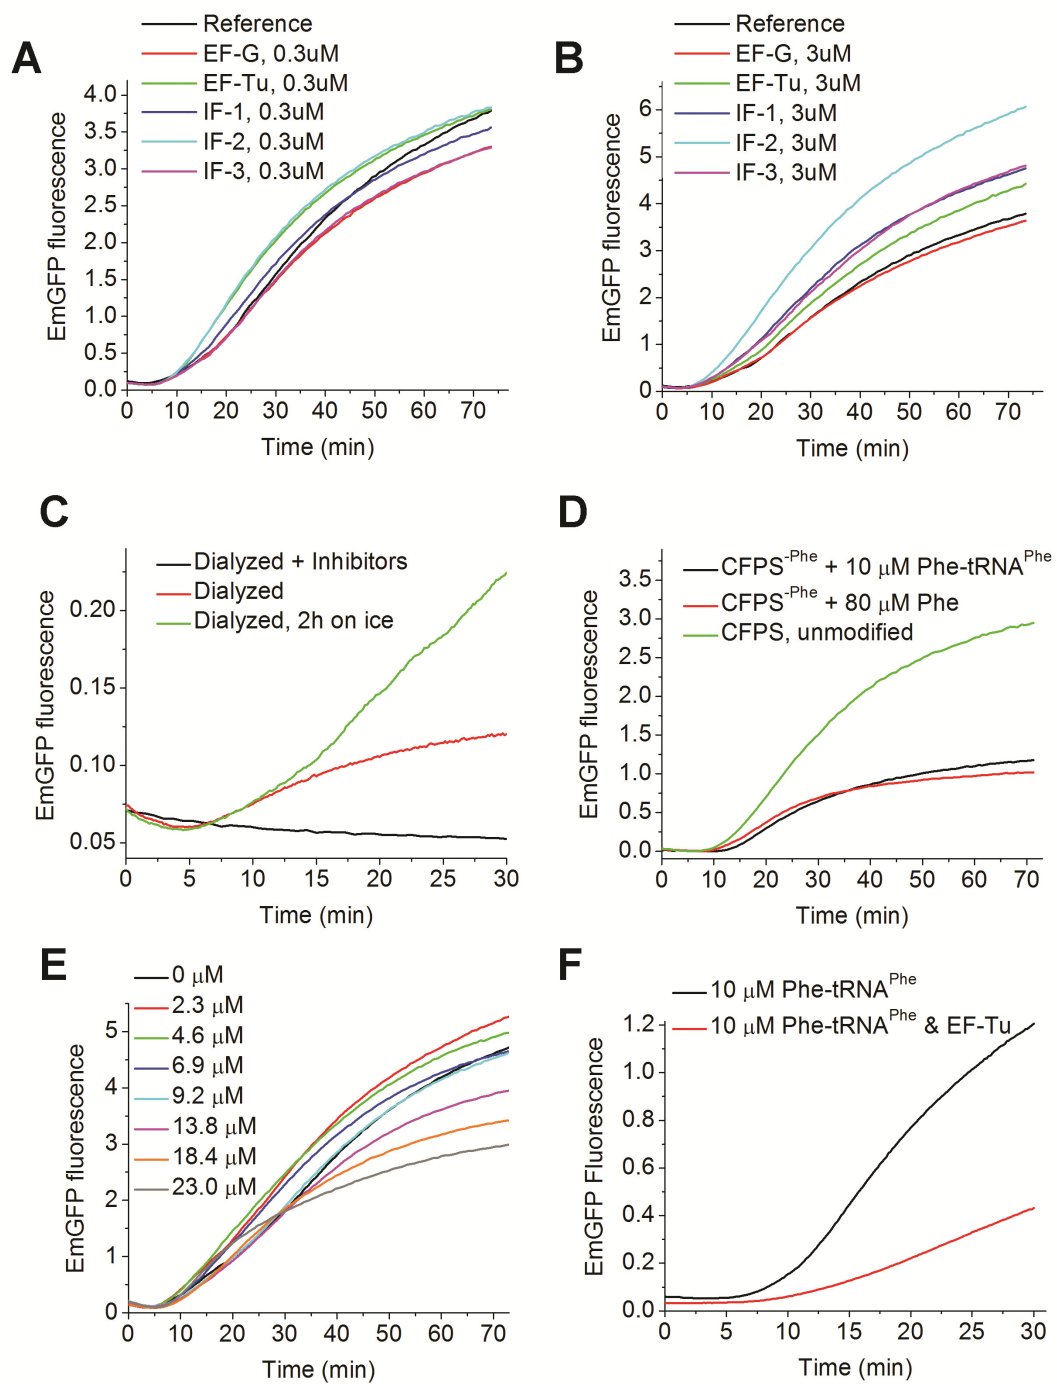

Fig. S4

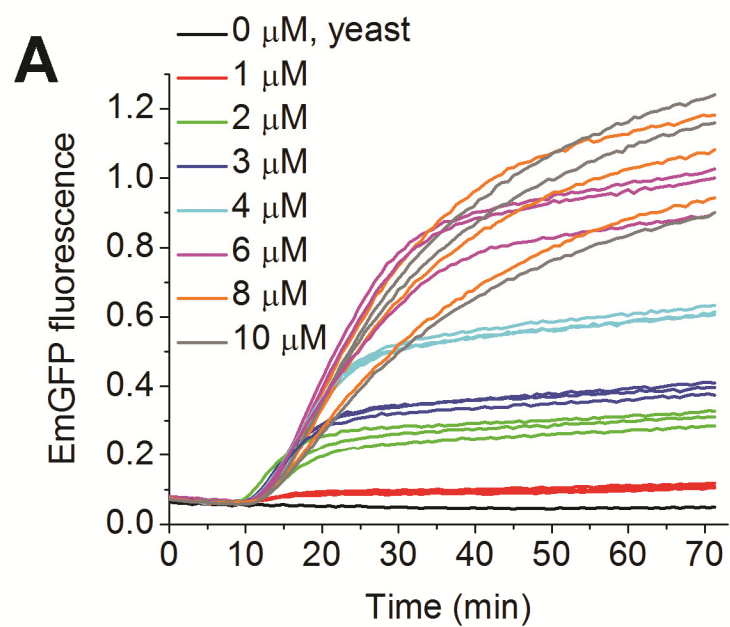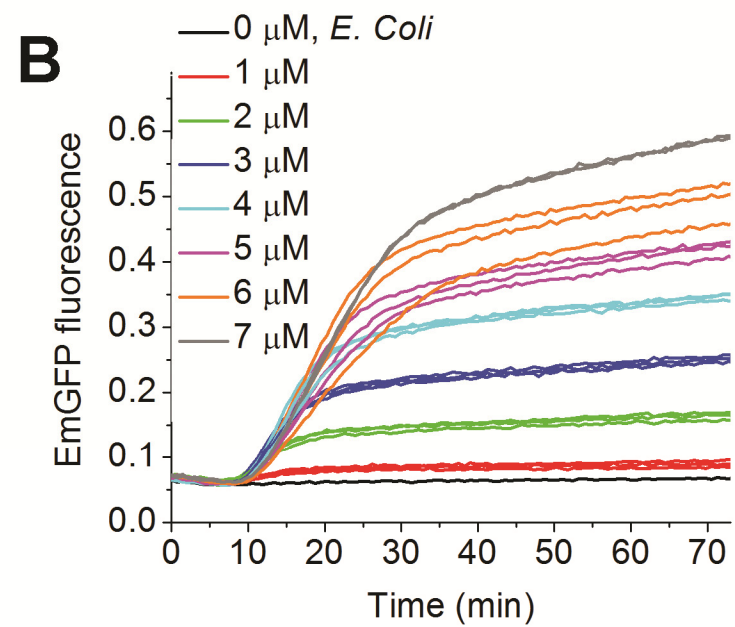

Fig. S5

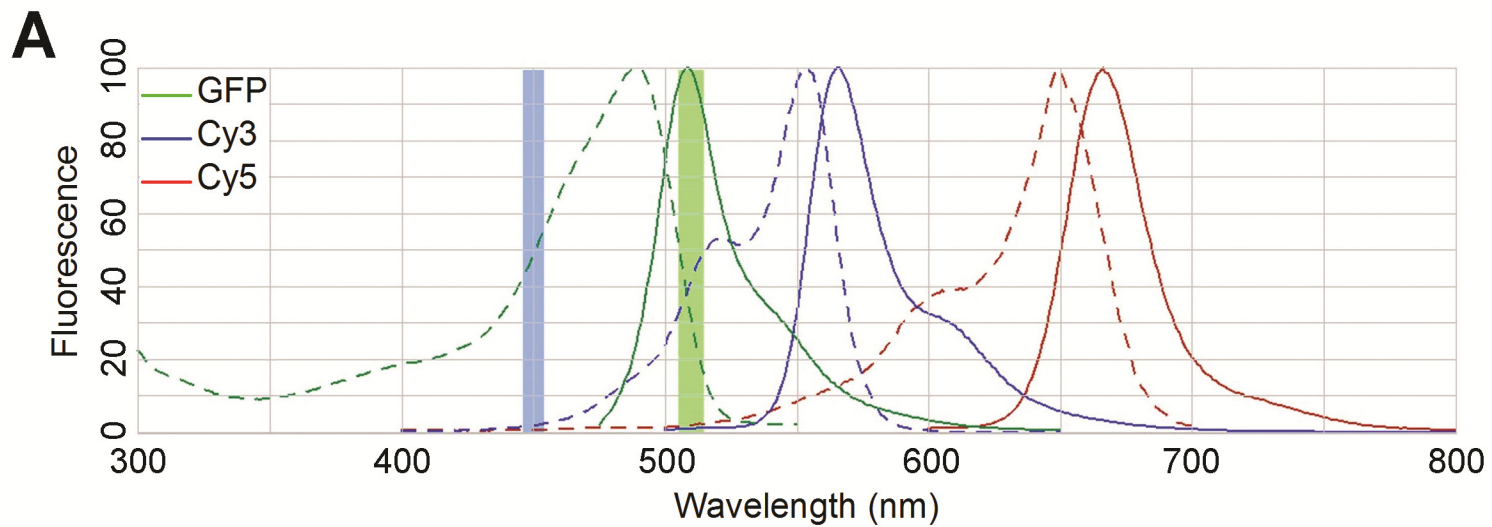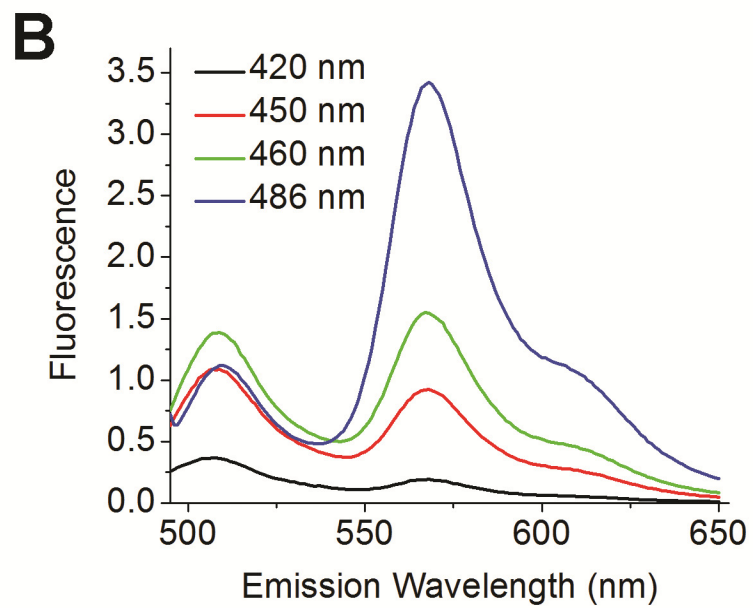

Fig. S6

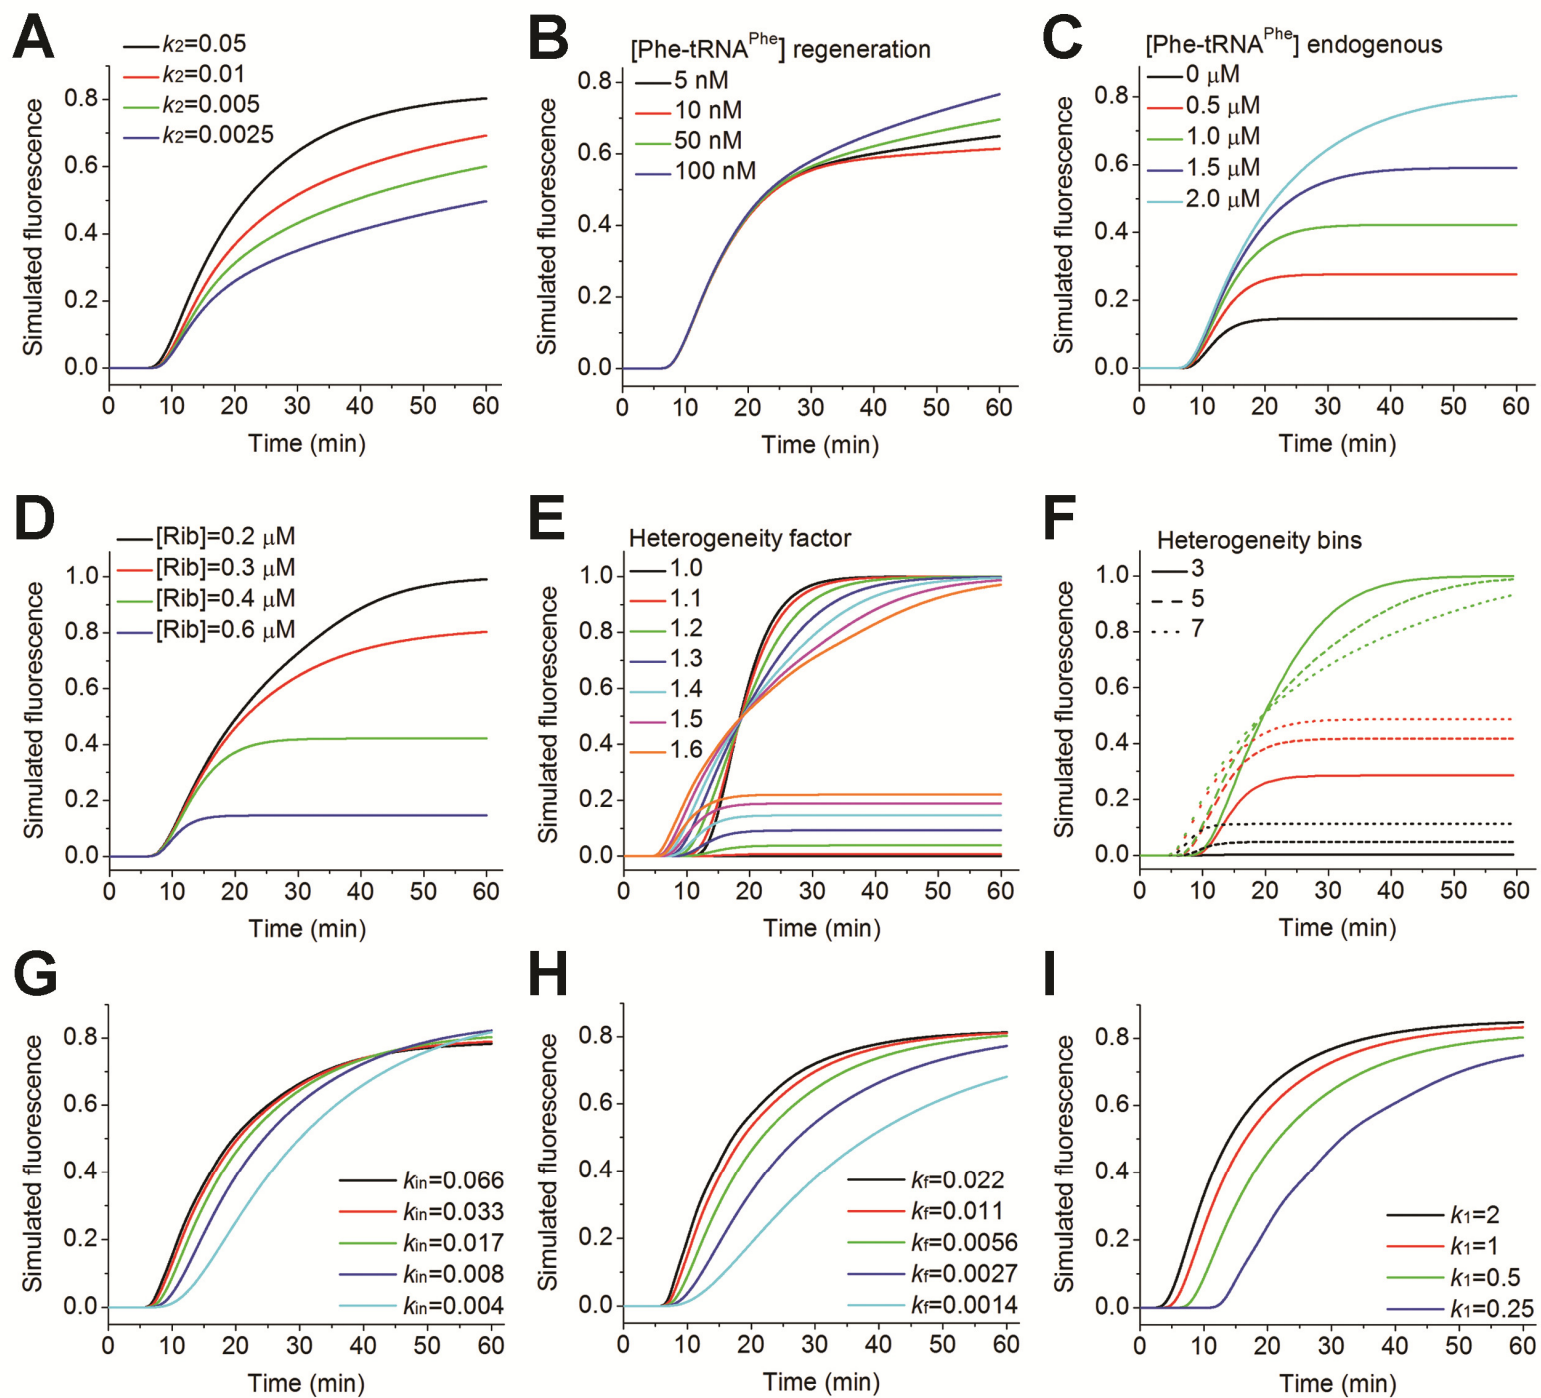

Supplement: supp_gks232_nar-02885-met-g-2011-File008.pdf [file supp_gks232_nar-02885-met-g-2011-File008.pdf]
